# Supplementary material for: Predator in proximity: how does a large carnivore respond to anthropogenic pressures at fine-scales? Implications for interface area management
Source: PeerJ. 2024 Jul 10;12:e17693. doi: 10.7717/peerj.17693 (PMC11246029; doi:10.7717/peerj.17693)
Supplement: Supplemental Information 15 [file peerj-12-17693-s015.xlsx]

## Sheet: EntirePTR since 2018 till study
S.no.	Year	Beat	Latitude	Longitude	Species Killed
1	2018	Chandranagar Buffer	24.7308	79.9424	Buffalo
2	2018	Bhusar	_	_	Buffalo
3	2018	Bhusar	_	_	Buffalo
4	2018	Chandranagar Buffer	24.7273	79.9917	Buffalo
5	2018	Chandranagar Buffer	24.7273	79.9917	Buffalo
6	2018	Chandranagar Buffer	_	_	Goat
7	2018	Bhusar	24.6159	79.7545	Buffalo
8	2018	Silon Buffer	_	_	Buffalo
9	2018	Bhusar	_	_	Buffalo
10	2018	Chandranagar Buffer	_	_	Cow
11	2018	Chokan	24.7285	79.9372	Goat
12	2018	Chokan	24.7285	79.9372	Goat
13	2018	Chokan	24.7285	79.9372	Goat
14	2018	Palkoha	24.393	79.5134	Buffalo
15	2018	Rajgadh	24.7156	79.9392	Ox
16	2018	Palkoha	-	-	Buffalo
17	2018	Palkoha	24.6032	79.7975	Buffalo
18	2018	Chokan	-	-	Cow
19	2018	Bhusor	-	-	Buffalo
20	2018	Chokan	-	-	Buffalo
21	2018	Repura	-	-	Buffalo
22	2018	Chokan	-	-	Buffalo
23	2019	Seja	-	-	Buffalo
24	2019	Chokan	-	-	Buffalo
25	2019	Chokan	-	-	Buffalo
26	2018	Koni	_	_	Ox
27	2018	Umravan	24.6744	80.0668	Ox
28	2018	Umravan	-	-	Ox
29	2018	Umravan	-	-	Buffalo
30	2018	Bandhi	-	-	Cow
31	2018	Bador	24.6495	80.0679	Buffalo
32	2018	Katriya	24.6656	80.0939	Buffalo
33	2018	Bador	24.6534	80.0651	Buffalo
34	2018	Katriya	24.6563	80.0693	Buffalo
35	2018	Umravan	24.6919	80.0549	Buffalo
36	2018	Umravan	24.7014	80.0777	Cow
37	2018	Bandhi	24.6907	80.1056	Buffalo
38	2018	Umravan	24.6749	80.0895	Buffalo
39	2018	Bandhi	24.7081	80.0986	Buffalo
40	2018	Bandhi	24.7238	80.088	Buffalo
41	2018	Bandhi	24.6898	80.1103	Buffalo
42	2018	Bandhi	-	-	Buffalo
43	2018	Katriya	24.6604	80.091	Buffalo
44	2018	Bador	24.6688	80.0695	Buffalo
45	2018	Bandhi	24.7045	80.1035	Ox
46	2019	Umravan	24.678	80.0618	Ox
47	2019	Nahri	24.7522	80.0409	Ox
48	2019	Katriya	24.6995	80.0996	Cow
49	2019	Umravan	24.6981	80.0883	Ox
50	2019	Nahri	24.7527	80.0423	Cow
51	2019	Umravan	24.7019	80.062	Buffalo
52	2019	Bador	24.6558	80.0641	Buffalo
53	2019	Umravan	24.6806	80.0717	Buffalo
54	2019	Katriya	24.6953	80.0931	Buffalo
55	2019	Umravan	24.6941	80.0569	Buffalo
56	2019	Bador	24.6526	80.0628	Buffalo
57	2019	Katriya	24.695	80.1216	Buffalo
58	2019	Umravan	24.6763	80.0588	Buffalo
59	2019	Bador	24.6588	80.0655	Ox
60	2019	Bador	24.6527	80.0628	Cow
61	2019	Umravan	24.6794	80.0756	Buffalo
62	2019	Umravan	24.7006	80.0744	Cow
63	2019	Umravan	24.7009	80.0775	Buffalo
64	2019	Bador	24.7114	80.1238	Buffalo
65	2019	Umravan	24.6757	80.0837	Buffalo
66	2019	Umravan	24.6909	80.0566	Buffalo
67	2019	Bador	24.6686	80.0687	Buffalo
68	2018	North Hinauta	24.672	80.0193	Buffalo
69	2018	Gangau B	24.5797	79.8491	Ox
70	2018	South Hinauta	24.6366	80.0549	Buffalo
71	2018	North Hinauta	24.669	80.0148	Cow
72	2018	Gangau B	24.5814	79.8494	Ox
73	2018	Gangau B	24.6131	79.8548	Buffalo
74	2018	South Hinauta	24.6331	80.0221	Cow
75	2018	West Hinauta	24.6456	80.0255	Buffalo
76	2018	North Hinauta	24.6519	80.0368	Buffalo
77	2018	South Hinauta	24.6419	80.0462	Buffalo
78	2018	South Hinauta	24.6429	80.0464	Cow
79	2019	South Hinauta	24.6514	80.0497	Buffalo
80	2019	South Hinauta	24.6511	80.0509	Buffalo
81	2019	North Hinauta	24.6751	80.0307	Buffalo
82	2019	North Hinauta	24.6603	80.0442	Cow
83	2019	North Hinauta	24.6598	80.0202	Buffalo
84	2020	South Hinauta	24.6342	80.0138	Buffalo
85	2020	West Hinauta	24.6571	80.013	Buffalo
86	2020	South Hinauta	24.6523	80.0517	Buffalo
87	2020	North Hinauta	24.6582	80.0362	Cow
88	2020	Gahri ghat	24.4884	79.8587	-
89	2018	Bhorkuwa	-	-	Buffalo
90	2018	Majhguwan	24.6059	79.7373	Buffalo
91	2018	Majhguwan	24.5943	79.7338	Buffalo
92	2018	Majhguwan	24.6109	79.7215	Buffalo
93	2018	Bhorkuwa	-	-	Buffalo
94	2018	Majhguwan	24.5991	79.7249	Buffalo
95	2018	Matipura	24.4061	79.7009	Buffalo
96	2018	Patori	24.4946	79.8454	Buffalo
97	2018	Patori	24.4983	79.8361	Buffalo
98	2019	Surai	24.4253	79.6784	Buffalo
99	2019	Majhguwan	-	-	Buffalo
100	2019	Nagda	24.413	79.6548	Buffalo
101	2019	Matipura	24.4407	79.6592	Ox
102	2019	Patori	24.4907	79.8453	Buffalo
103	2019	Patori	24.4917	79.8454	Buffalo
104	2018	Nararan	24.6533	79.9473	Buffalo
105	2018	Lalar	24.667	79.8881	Buffalo
106	2018	Madla	24.7009	80.0224	Buffalo
107	2018	Bardhau	-	-	Buffalo
108	2018	Lalar	24.6814	79.9279	Cow
109	2018	Lalar	24.6688	79.9256	Cow
110	2018	Bardhau	_	_	Buffalo
111	2018	Lalar	24.6629	79.931	Buffalo
112	2018	Lalar	24.6834	79.9096	Buffalo
113	2018	Umravan	24.719	80.1231	Buffalo
114	2019	Madla	-	-	Buffalo
115	2019	Madla	24.7198	80.0002	Buffalo
116	2019	Bador Seha	24.6904	80.0302	Buffalo
117	2019	Lalar	24.6697	79.8984	Ox
118	2019	Bardhau	-	-	Buffalo
119	2019	Madla	-	-	Buffalo
120	2018	Amjhiriya	24.6087	80.1326	Buffalo
121	2018	South Bandhi	24.5627	80.109	Ox
122	2018	Katari Abharayan	24.5783	79.948	Ox
123	2018	Katari Abharayan	24.5728	79.9531	Cow
124	2018	Akola Buffer	24.6347	80.1225	Ox
125	2018	Akola Buffer	24.6693	80.108	Cow
126	2018	Akola Buffer	24.6708	80.1078	Cow
127	2018	South Bandhi	24.5435	80.1118	Cow
128	2018	South Bandhi	24.5435	80.1118	Cow
129	2018	Gahdara	24.55	79.9847	Ox
130	2018	Akola Buffer	24.6373	80.1171	Cow
131	2018	North Bandhi	24.5616	80.1437	Cow
132	2018	Akola Buffer	24.6382	80.1138	Cow
133	2018	Kudan	24.5641	80.0004	Cow
134	2018	Kudan	24.5641	80.002	Cow
135	2018	Kudan	24.5629	79.8465	Goat
136	2018	Gahdara	_	_	Cow
137	2018	Gahdara	_	_	Ox
138	2018	Gahdara	24.5543	79.9772	Cow
139	2018	North Bandhi	24.5483	80.1548	Buffalo
140	2018	Rajabariya	24.6231	80.1231	Ox
141	2018	Akola Buffer	24.6119	80.1174	Cow
142	2018	Akola Buffer	24.6451	80.1089	Ox
143	2018	Akola Buffer	24.6571	80.1126	Ox
144	2018	Akola Buffer	24.6297	80.1366	Ox
145	2018	Akola Buffer	24.6287	80.1373	Cow
146	2018	Rajabariya	24.6364	80.1102	Ox
147	2018	Akola Buffer	24.646	80.1172	Ox
148	2018	South Bandhi	24.5808	80.1138	Buffalo
149	2018	South Bandhi	24.5816	80.114	Buffalo
150	2018	Katari Abharayan	24.5724	79.9526	Ox
151	2018	Katari Abharayan	24.5636	79.9679	Ox
152	2018	Akola Buffer	24.636	80.1182	Buffalo
153	2018	Gahdara	24.5497	79.9926	Ox
154	2018	Amjhiriya	24.6428	80.156	Ox
155	2018	Jhalai	24.6122	80.1733	Ox
156	2018	Rajabariya	24.611	80.0997	Buffalo
157	2018	Rajabariya	24.611	80.0997	Buffalo
158	2018	Jardhowa	24.6445	80.0942	Buffalo
159	2018	Jardhowa	24.6299	80.0908	Buffalo
160	2018	Amjhiriya	24.6286	80.1373	Buffalo
161	2018	Gahdara	24.5504	79.9618	Cow
162	2018	Amjhiriya	24.6212	80.1398	Buffalo
163	2018	Akola Buffer	24.6381	80.1315	Cow
164	2018	Barach	24.603	80.1612	Buffalo
165	2018	Bador	24.6555	80.0743	Buffalo
166	2018	North Bandhi	24.559	80.1186	Buffalo
167	2018	Gahdara	_	_	Ox
168	2018	South Bandhi	24.5343	80.1475	Buffalo
169	2018	Jhalai	24.6141	80.1665	Cow
170	2018	Akola Buffer	24.6547	80.1186	Buffalo
171	2018	Akola Buffer	24.6385	80.1538	Ox
172	2019	Bador	24.6399	80.0579	Buffalo
173	2019	Barach	24.6014	80.1522	Ox
174	2019	Gahdara	24.5485	79.9814	Ox
175	2019	Gahdara	24.5592	79.9888	Ox
176	2019	Barach	24.613	80.1478	Buffalo
177	2019	Amjhiriya	24.6307	80.1614	Buffalo
178	2019	North Bandhi	24.5931	80.1208	Ox
179	2019	Barach	24.6013	80.1605	Ox
180	2019	Rampura	24.5887	80.0735	Ox
181	2019	Jardhowa	24.6316	80.1074	Ox
182	2019	Amjhiriya	24.6124	80.1491	Ox
183	2019	Akola Buffer	24.644	80.1145	Cow
184	2019	_	_	_	Cow
185	2019	Barach	24.5705	80.1442	Buffalo
186	2019	Barach Jhalai	24.6064	80.1608	Buffalo
187	2019	Gahdara	24.5487	79.9711	Ox
188	2019	South Bandhi	24.5739	80.1149	Buffalo
189	2019	Jardhowa	_	_	Buffalo
190	2019	Katari Abharayan	24.5724	79.959	Ox
191	2019	Jardhowa	24.6292	80.1009	Buffalo
192	2019	Amjhiriya	24.6082	80.1479	Buffalo
193	2019	Jhalai	24.5892	80.1708	Ox
194	2019	Barach	24.5905	80.1627	Cow
195	2019	Akola	24.6385	80.1324	Buffalo
196	2019	Gahdara	24.5508	79.9624	Cow
197	2019	Katari Abharayan	24.5749	79.9521	Ox
198	2019	Barach	24.9758	80.2679	Cow
199	2019	Rampura	24.584	80.0811	Cow
200	2019	Jhalai	24.5785	80.1716	Buffalo
201	2019	Akola Buffer	24.6323	80.1221	Buffalo
202	2019	Katari Abharayan	24.566	79.9747	Cow
203	2019	South Bandhi	24.5585	80.1183	Cow
204	2019	Akola Buffer	24.6593	80.1268	Buffalo
205	2019	South Bandhi	24.5702	80.1128	Cow
206	2019	Gahdara Abharayan	24.5572	79.9753	Cow
207	2020	Gahdara Abharayan	24.5616	79.9764	Cow
208	2020	Katari Abharayan	24.5613	79.9602	Cow
209	2020	South Bandhi	24.5704	80.1126	Cow
210	2020	South Bandhi	24.5481	80.1316	Cow
211	2020	North Bandhi	24.5791	80.1238	Cow
212	2020	Barach	_	_	Ox
213	2020	Katari Abharayan	_	_	Ox
214	2020	Rampura	24.5869	80.0733	Cow
215	2020	Rampura	24.5875	80.0705	Cow
216	2020	Akola	24.5665	80.1193	Goat
217	2020	Barach	24.9198	_	Ox
218	2020	Rajabariya	24.622	80.1178	Buffalo
219	2020	Rajabariya	24.6174	80.0974	Buffalo
220	2020	Gahdara Abharayan	24.332	79.5847	Ox
221	2020	Barach	_	_	Buffalo
222	2020	Katari Abharayan	24.5696	79.9483	Ox
223	2020	Katari Abharayan	24.5696	79.9483	Ox
224	2020	Amjhiriya	24.6037	80.1479	Buffalo
225	2020	Akola	24.6474	80.1223	Buffalo
226	2020	Akola	24.6311	80.1397	Cow
227	2020	Jhalai	24.5953	80.1824	Buffalo
228	2020	Jhalai	24.5824	80.1712	Buffalo
229	2020	Jhalai	24.6098	80.171	Cow
230	2020	Akola	24.6251	80.1362	Ox
231	2020	Amjhiriya	24.6021	80.1373	Buffalo
232	2020	Amjhiriya	24.6032	80.1393	Buffalo
233	2020	Amjhiriya	24.612	80.1374	Cow
234	2020	Bador	24.6415	80.0601	Buffalo
235	2020	Barach	24.5596	80.1768	Cow			_
236	2020	South Bandhi	24.5726	80.1127	Cow
237	2020	Amjhiriya	24.6039	80.1452	Buffalo
238	2020	Gahdara Abharayan	_	_	Cow
239	2020	Katari Abharayan	_	_	Ox
240	2020	Barach	24.6036	80.1611	Ox
241	2020	Jhalai	_	_	Cow
242	2020	North Bandhi	24.5877	80.1171	Cow
243	2020	South Bandhi	24.5773	80.1135	Cow
244	2020	South Bandhi	24.5683	80.1201	Cow
245	2020	Rajabariya	24.6296	80.1109	Buffalo
246	2020	South Bandhi	_	_	Ox
247	2020	South Bandhi	24.5792	80.1128	Cow
248	2020	Barach	24.5867	80.1175	Ox
249	2020	South Bandhi	24.0095	80.0018	Cow
250	2020	South Bandhi	_	_	Cow
251	2020	Akola	24.6337	80.1226	Buffalo
252	2020	South Bandhi	24.5226	80.1366	Buffalo

## Sheet: Within study area and season
S.no.	Grid_Name	X	Y
1	133	80.073	24.542
2	154	80.1086	24.5501
3	162	80.0004	24.5641
4	162	80.002	24.5641
5	173	80.109	24.5627
6	174	80.1186	24.559
7	174	80.1193	24.5665
8	175	80.1298	24.55
9	176	80.1401	24.5614
10	190	80.055	24.5736
11	196	80.1128	24.5702
12	219	80.1238	24.5791
13	223	80.1678	24.5784
14	234	80.0708	24.5905
15	234	80.0705	24.5875
16	235	80.0735	24.5887
17	235	80.0733	24.5869
18	239	80.1208	24.5931
19	244	80.1673	24.5855
20	260	80.139	24.6001
21	262	80.1522	24.6014
22	262	80.1605	24.6013
23	276	80.1174	24.6119
24	278	80.1326	24.6087
25	292	80.0974	24.6174
26	297	80.1478	24.613
27	297	80.1491	24.6124
28	299	80.1665	24.6141
29	309	80.1178	24.622
30	310	80.1231	24.6231
31	311	80.1366	24.6297
32	311	80.1373	24.6287
33	315	80.0579	24.6399
34	320	80.1102	24.6364
35	321	80.1184	24.6368
36	321	80.117	24.6394
37	321	80.1171	24.6373
38	321	80.1138	24.6382
39	322	80.1231	24.6335
40	322	80.1225	24.6347
41	323	80.1325	24.6379
42	325	80.1538	24.6385
43	325	80.1614	24.6307
44	335	80.0743	24.6555
45	336	80.1255	24.6568
46	339	80.1126	24.6571
47	339	80.1186	24.6547
